# Supplementary material for: Factors associated with long-term use of digital devices in the electronic Framingham Heart Study
Source: PubMed Central journal article supplement (PMC9792462; doi:10.1038/s41746-022-00735-1), 2022-12-27
Supplement: 41746_2022_735_MOESM1_ESM.pdf [file 41746_2022_735_MOESM1_ESM.pdf]

# Supplementary Information

## Factors Associated with Long-term Use of Digital Devices in the Electronic Framingham Heart Study

Chathurangi H Pathiravasan\*<sup>1</sup>, Yuankai Zhang<sup>1</sup>, Xuzhi Wang<sup>1</sup>, Ludovic Trinquart<sup>1,2,3</sup>, Emelia J Benjamin<sup>4,5</sup>, Belinda Borrelli<sup>6</sup>, David D McManus<sup>7,8</sup>, Vik Kheterpal<sup>9</sup>, Honghuang Lin<sup>7</sup>, Nicole L Spartano<sup>10</sup>, Eric Schramm<sup>9</sup>, Chunyu Liu<sup>1</sup>, Joanne M Murabito<sup>4,11</sup>

1. Department of Biostatistics, Boston University School of Public Health, Boston, MA, USA
2. Institute for Clinical Research and Health Policy Studies, Tufts Medical Center, Boston, MA, USA
3. Tufts Clinical and Translational Science Institute, Tufts University, Boston, MA, USA
4. Boston University's and National Heart, Lung, and Blood Institute's Framingham Heart Study, Framingham, MA, USA
5. Section of Cardiovascular Medicine, Department of Medicine, Boston Medical Center, Boston University Schools of Medicine and Department of Epidemiology, Boston University School of Public Health, Boston, MA, USA
6. Henry M. Goldman School of Dental Medicine, Center for Behavioral Science Research, Department of Health Policy & Health Services Research, Boston University, Boston, MA, USA
7. Department of Medicine, University of Massachusetts Chan Medical School, Worcester, MA, USA
8. Department of Quantitative Health Sciences, University of Chan Massachusetts Medical School, Worcester, MA, USA
9. Care Evolution, Ann Arbor, MI, USA
10. Section of Endocrinology, Diabetes, Nutrition, and Weight Management, Boston University School of Medicine, Boston, MA, USA
11. Section of General Internal Medicine, Department of Medicine, Boston University School of Medicine and Boston Medical Center, Boston, MA, USA

\* Corresponding author: chathurangi.heshani@gmail.com

### Table of Contents

|                                                                                                                                                                                                                                                                                                                                                                                               |    |
|-----------------------------------------------------------------------------------------------------------------------------------------------------------------------------------------------------------------------------------------------------------------------------------------------------------------------------------------------------------------------------------------------|----|
| <b>Supplementary Figure 1.</b> Venn diagram of participants who returned surveys, blood pressure cuff measurements and smartwatch data .....                                                                                                                                                                                                                                                  | 1  |
| <b>Supplementary Figure 2.</b> Domains and individual factors hypothesized to be associated with the use of eFHS system components .....                                                                                                                                                                                                                                                      | 2  |
| <b>Supplementary Figure 3.</b> Primary Analysis: Analysis Workflow. Note: Here * refer to each predictors listed in the Figure 2 in the manuscript, ** refer to time of use (weeks for device use and 3-month period for app use). P values are derived using Z test statistic from generalized linear mixed models (GLMM) .....                                                              | 3  |
| <b>Supplementary Figure 4:</b> Secondary Analysis: Analysis Workflow. Note: Here * refer to time of use groups (mobile app use: 3-months intervals, Smartwatch & BP Cuff use: weeks $\leq$ 26 and weeks $>$ 26) and ** refer to age groups: age $\leq$ 53 and age $>$ 53 years (median age 53). P values are derived using Z test statistic from generalized linear mixed models (GLMM) ..... | 4  |
| <b>Supplementary Figure 5.</b> Correlation of Smartwatch Use and Digital BP Cuff Use .....                                                                                                                                                                                                                                                                                                    | 5  |
| <b>Supplementary Table 1.</b> eFHS Baseline and Follow-up Survey Components and All survey questions .....                                                                                                                                                                                                                                                                                    | 6  |
| <b>Supplementary Table 2:</b> Characteristics of participants in eFHS Participants vs those who did not enroll in the eFHS .....                                                                                                                                                                                                                                                              | 21 |
| <b>Supplementary Table 3.</b> Definitions of Smartphone App Use, Smartwatch Use, and Digital BP Cuff Use .....                                                                                                                                                                                                                                                                                | 22 |
| <b>Supplementary Table 4.</b> Predictor variables selection for final multivariable model of smartphone app use (completing at least one survey) .....                                                                                                                                                                                                                                        | 23 |
| <b>Supplementary Table 5.</b> Predictor variables selection for final multivariable model of smartphone app use (completing all surveys) .....                                                                                                                                                                                                                                                | 25 |
| <b>Supplementary Table 6.</b> Stratified analysis with smartphone app use of each 3- month period .....                                                                                                                                                                                                                                                                                       | 27 |
| <b>Supplementary Table 7.</b> Stratified analysis for app use according to different age groups .....                                                                                                                                                                                                                                                                                         | 28 |
| <b>Supplementary Table 8.</b> Predictor variables selection for final multivariable model of smartwatch use .....                                                                                                                                                                                                                                                                             | 29 |
| <b>Supplementary Table 9.</b> Predictor variables selection for final multivariable model of digital blood pressure cuff use .....                                                                                                                                                                                                                                                            | 31 |
| <b>Supplementary Table 10.</b> Stratified analysis with smartwatch use time (Weeks $\leq$ 26 and Weeks $>$ 26) .....                                                                                                                                                                                                                                                                          | 33 |
| <b>Supplementary Table 11.</b> Stratified analysis with digital blood pressure cuff use time (Weeks $\leq$ 26 and Weeks $>$ 26) .....                                                                                                                                                                                                                                                         | 34 |
| <b>Supplementary Table 12.</b> Stratified analysis for smartwatch use according to different age groups (Age $\leq$ 53 and Age $>$ 53) .....                                                                                                                                                                                                                                                  | 35 |
| <b>Supplementary Table 13.</b> Stratified analysis for digital blood pressure cuff use according to different age groups (Age $\leq$ 53 and Age $>$ 53) .....                                                                                                                                                                                                                                 | 36 |
| <b>Supplementary Table 14.</b> Characteristics of eFHS Participants stratified according different age groups .....                                                                                                                                                                                                                                                                           | 37 |
| <b>Supplementary Table 15.</b> Characteristics of eFHS Participants stratified according type of phone .....                                                                                                                                                                                                                                                                                  | 38 |

**Supplementary Figure 1.** Venn diagram of participants who returned surveys, blood pressure cuff measurements and smartwatch data

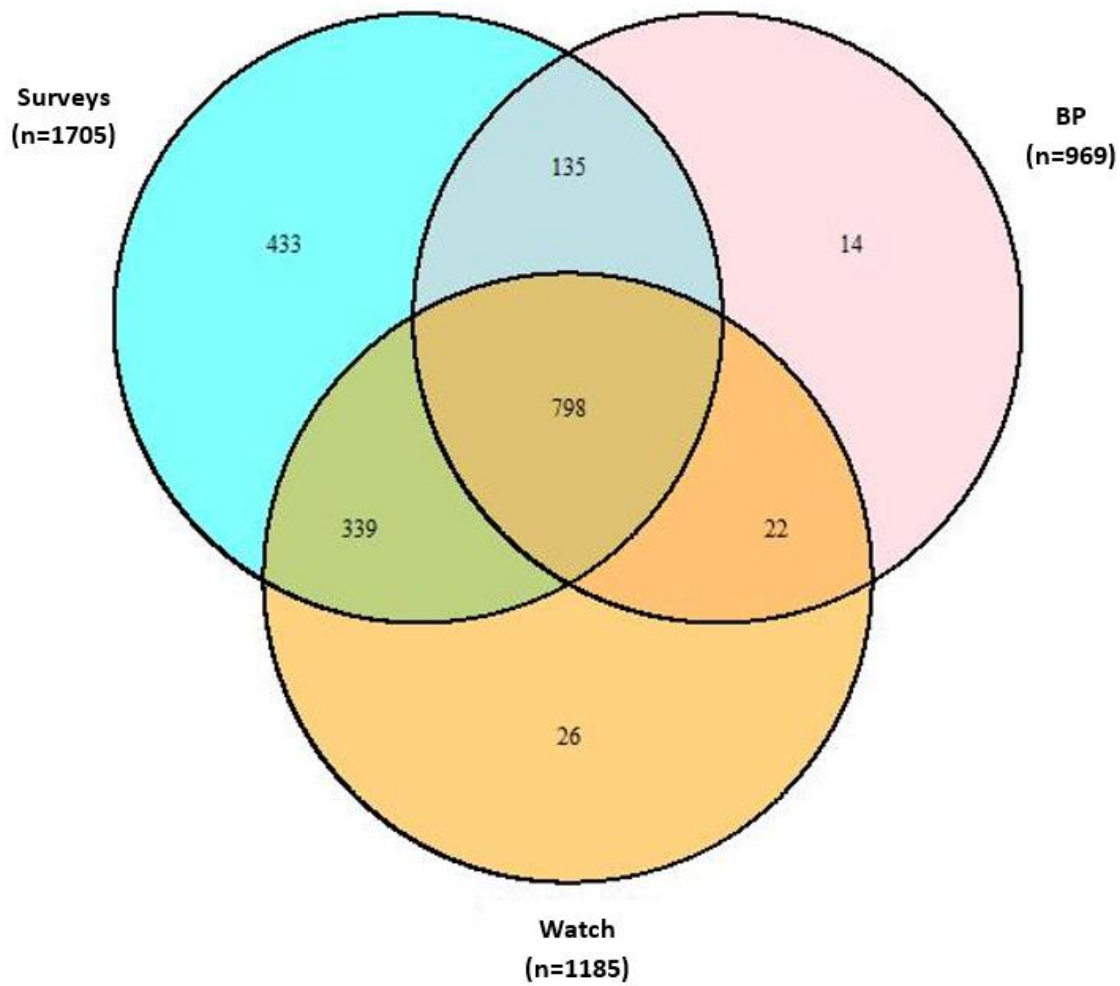

**Supplementary Figure 2.** Domains and individual factors hypothesized to be associated with the use of eFHS system components

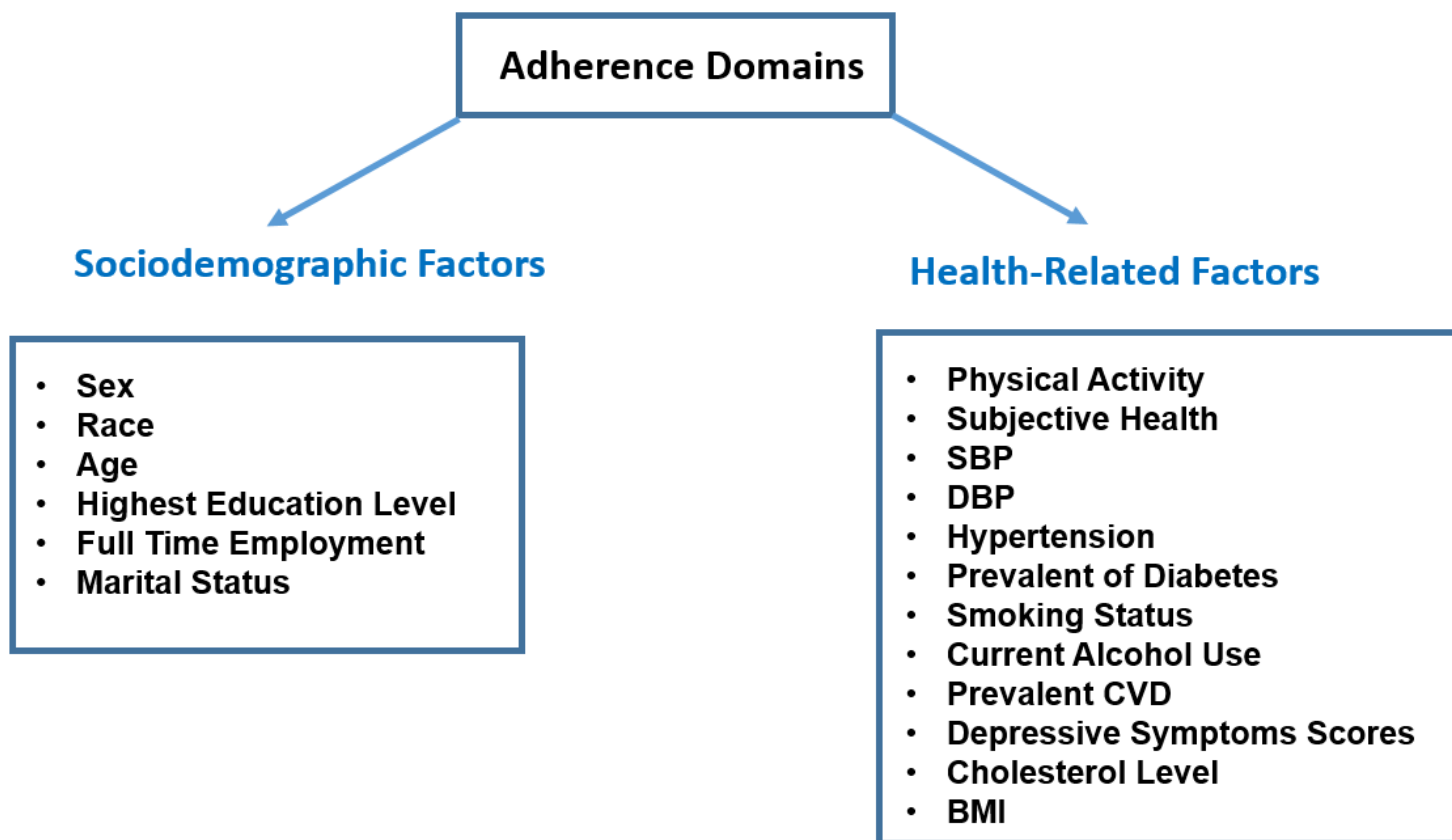

**Supplementary Figure 3.** Primary Analysis: Analysis Workflow. Note: Here \* refers to each predictor listed in Figure 2 in the manuscript, \*\* refers to time of use (weeks for device use and 3-month period for app use). P values are derived using Z test statistic from generalized linear mixed models (GLMM)

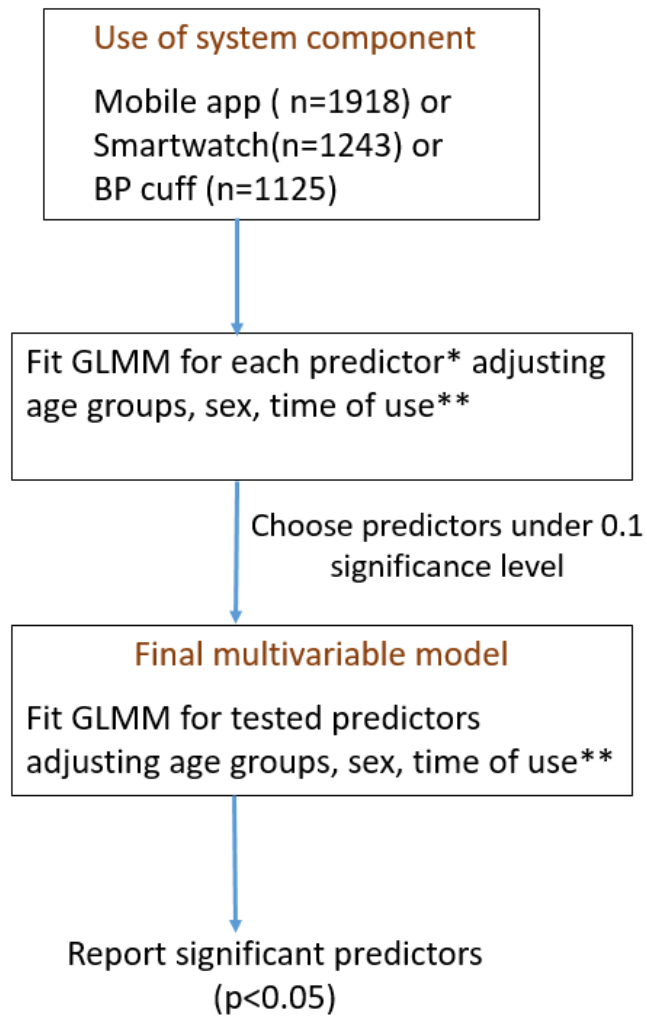

**Supplementary Figure 4: Secondary Analysis: Analysis Workflow.** Note: Here \* refers to time of use groups (mobile app use: 3-months intervals, Smartwatch & BP Cuff use: weeks  $\leq 26$  and weeks  $> 26$ ) and \*\* refers to age groups: age  $\leq 53$  and age  $> 53$  years (median age 53). P values are derived using Z test statistic from generalized linear mixed models (GLMM)

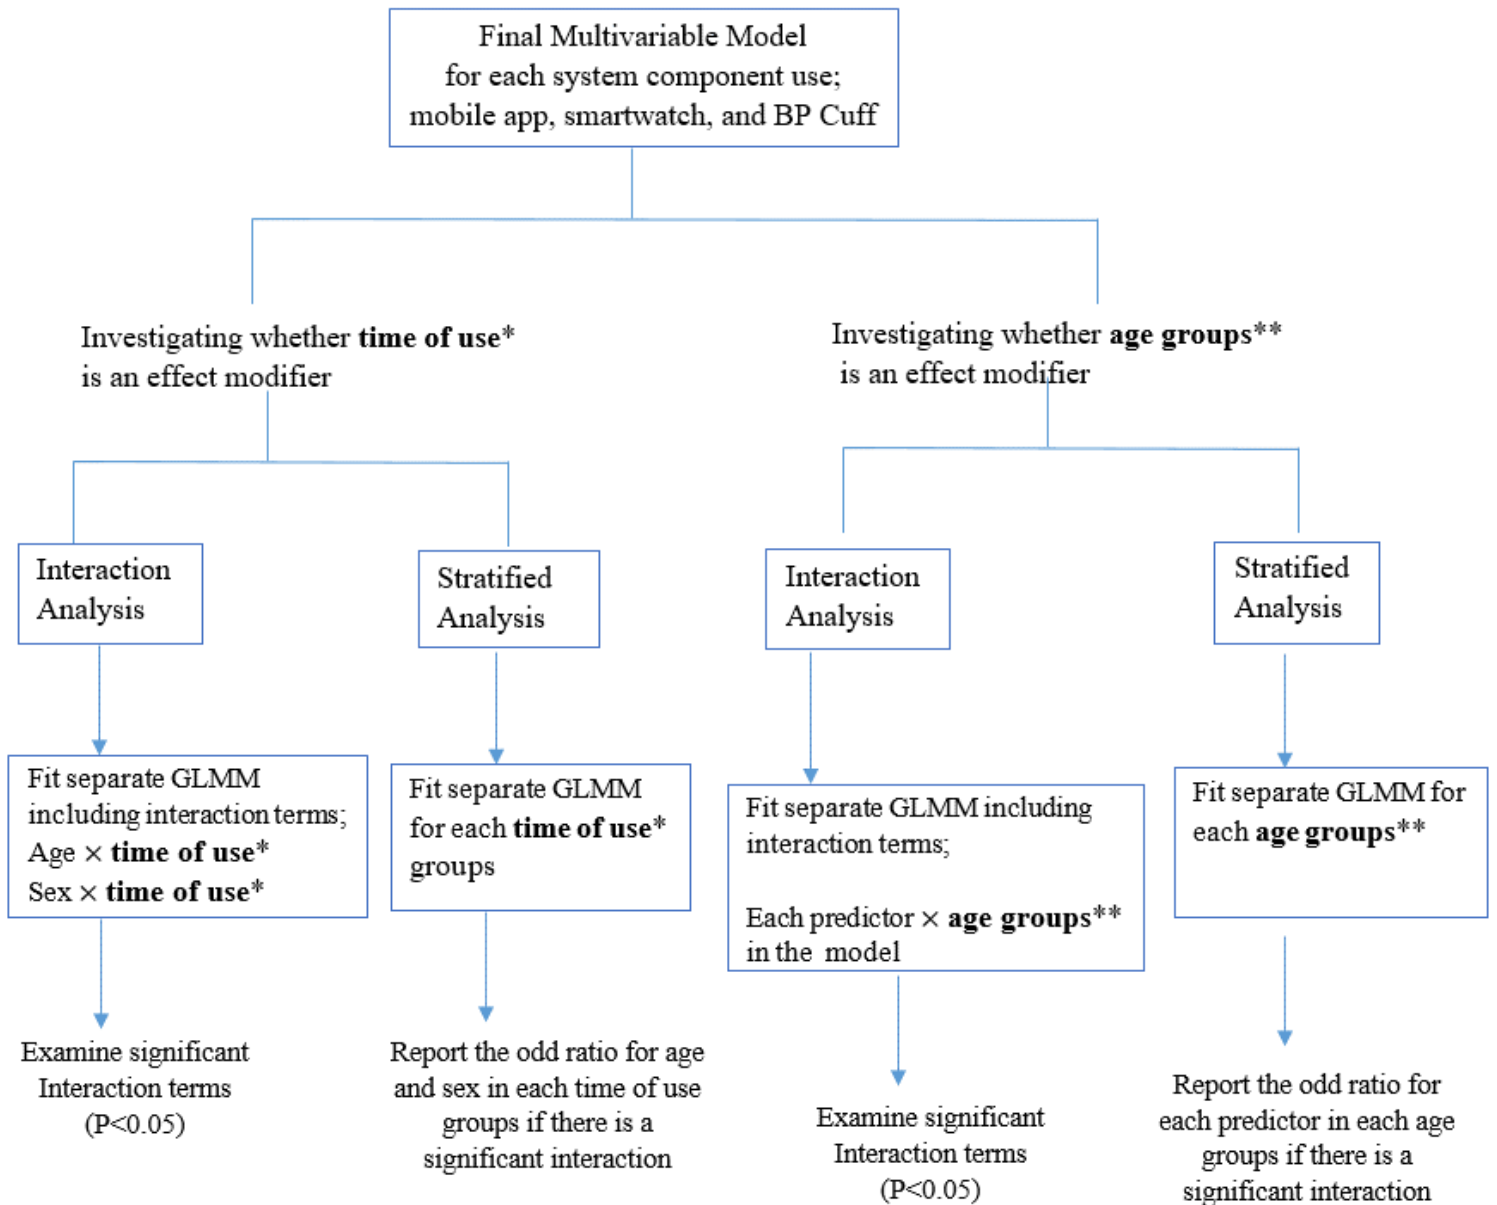

**Supplementary Figure 5.** Correlation of Smartwatch Use and Digital BP Cuff Use

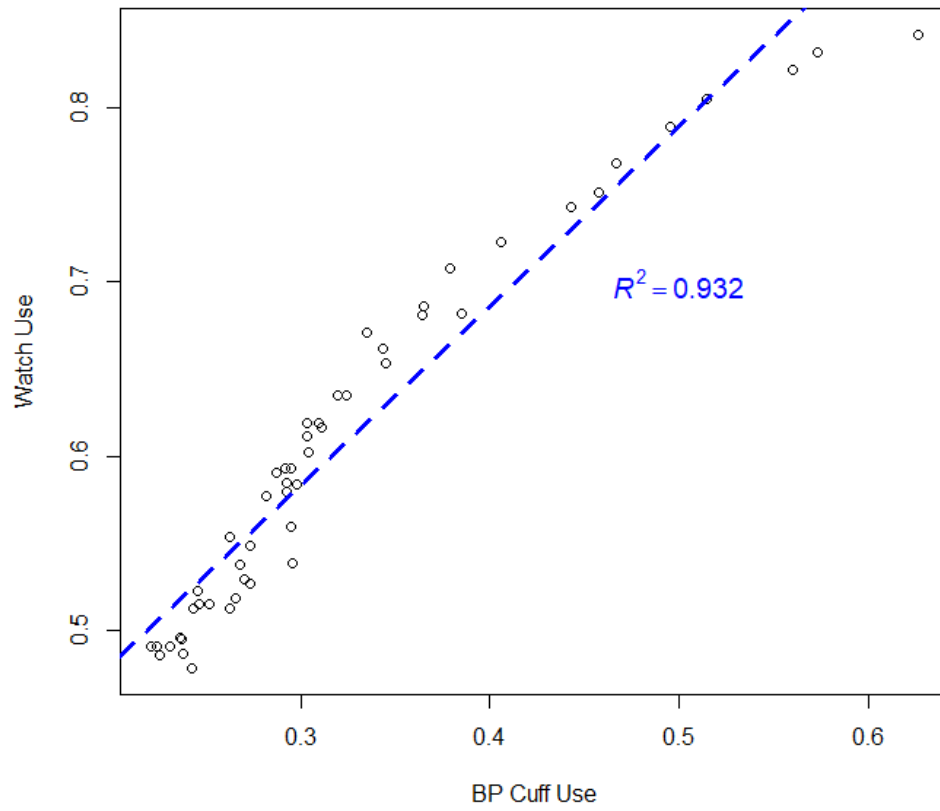

**Supplementary Table 1.** eFHS Baseline and Follow-up Survey Components and All survey questions

---

**eFHS Baseline and Follow-up Survey Components**

---

| Time of Survey Deployment | Surveys Deployed                                                                                                                                                                                                                                                                                                                                         |
|---------------------------|----------------------------------------------------------------------------------------------------------------------------------------------------------------------------------------------------------------------------------------------------------------------------------------------------------------------------------------------------------|
| <b>Baseline*</b>          | <ol style="list-style-type: none"> <li>1. Socio-demographics</li> <li>2. Medications and self-reported risk factors</li> <li>3. Smoking</li> <li>4. Alcohol use</li> <li>5. Physical activity</li> <li>6. Depressive symptoms (CES-D)</li> <li>7. Health Survey</li> <li>8. Baseline CVD history</li> <li>9. Baseline non-CVD Medical history</li> </ol> |
| <b>3 months*</b>          | <ol style="list-style-type: none"> <li>1. Physical activity</li> </ol>                                                                                                                                                                                                                                                                                   |
| <b>6 months*</b>          | <ol style="list-style-type: none"> <li>1. Medical history update</li> <li>2. Physical activity</li> <li>3. Depressive symptoms (CES-D)</li> <li>4. Health Survey</li> </ol>                                                                                                                                                                              |
| <b>9 months*</b>          | <ol style="list-style-type: none"> <li>1. Physical activity</li> </ol>                                                                                                                                                                                                                                                                                   |
| <b>12 months*</b>         | <ol style="list-style-type: none"> <li>1. Medical history update</li> <li>2. Medications and self-reported risk factors</li> <li>3. Physical activity</li> <li>4. Depressive symptoms (CES-D)</li> <li>5. Health Survey</li> <li>6. Smoking</li> <li>7. Alcohol intake</li> </ol>                                                                        |

---

**All survey questions**

---

• **Socio-demographics**

1. "What is your current marital status?"

- Single, never married
- Married
- Separated
- Divorced
- Widowed
- Living with partner
- Prefer not to answer

2. "What is the HIGHEST degree or level of school you have completed? (Select one) If you are currently enrolled, select the highest grade you have completed or the highest degree you have received."

- No schooling
- Grades 1-8
- Grades 9-11
- Completed high school (12th grade) or GED
- Some college but no degree
- Technical school certificate
- Associate degree (Junior college AA, AS)

Bachelor's degree (BA, AB, BS)  
Graduate or professional degree (master's, doctorate, MD, etc.)  
Prefer not to answer

3. Please choose which of the following best describes your current employment status. (Select one)

Homemaker, not working outside the home  
Employed (or self-employed) full time  
Employed (or self-employed) part time  
Employed, but on leave for health reasons  
Employed, but temporarily away from my job  
Unemployed or laid off  
Retired from my usual occupation and not working  
Retired from my usual occupation but working for pay  
Retired from my usual occupation but volunteering  
Prefer not to answer  
Unemployed due to disability  
Full-time student

4. What is your current occupation? Please select the response that best describes your occupation.

homemaker  
retired  
self-employed business owner  
M.D./dentist  
lawyer/judge  
psychologist/social worker/mental health counselor  
scientist/research  
engineer/computer science  
banker/accountant  
manager/consultant (e.g. production manager)  
administrative (e.g. personnel)  
educator  
nurse/medical personnel  
laboratory technician  
physical/occupational/speech therapist  
secretary/clerk/data entry  
retail/cashier  
sales/marketing/insurance  
realtor  
writer/editor  
artist/graphic designer/craftperson

5. Please select the income group that best represents your combined family income for the past 12 months.  
(Select one)

Under \$20,000  
\$20,000 – \$34,999  
\$35,000 – \$54,999  
\$55,000 – \$74,999  
\$75,000 – \$100,000  
Over \$100,000  
Prefer not to answer

6. How many people are supported by this income?



7. What form of health insurance do you have currently? (Select ALL that apply)

- Blue Cross Blue Shield
- Harvard-Pilgrim
- Tufts
- Aetna
- United Health Care
- Medicare
- Medicaid
- Military or Veteran's administration sponsored
- Other

8. Do you have prescription drug coverage?

• **Alcohol use**

1. Do you drink beer at least once a month?
2. Average number of servings of beer (12oz bottle, glass, can)
3. Do you drink wine at least once a month?
4. Average number of servings of wine (red or white, 4oz glass)
5. Do you drink liquor/spirits at least once a month?
6. Average number of servings of liquor/spirits (1oz cocktail/highball)
7. At what age did you stop drinking alcohol?
8. Over the past year, on average on how many days per week did you drink an alcoholic beverage of any type?
9. Over the past year, on a typical day when you drink, how many drinks do you have?
10. What was the maximum number of drinks you had in a 24 hour period during the past month?
11. Since your last FHS examination, has there been a time in your life when you drank 5 or more alcoholic drinks of any kind almost daily?

• **Medications and self-reported risk factors**

1. In the PAST YEAR, have you been told by the doctor that you have any of the following conditions? (Select ALL that apply)

- High blood pressure or hypertension
- High blood cholesterol or high triglycerides
- High blood sugar or diabetes
- None of the above

2. In the PAST YEAR, have you taken medication for any of the following conditions? (Select ALL that apply)

- High blood pressure or hypertension
- High blood cholesterol or high triglycerides
- High blood sugar or diabetes
- Cardiovascular disease (for example angina/chest pain, heart failure, atrial fibrillation/heart rhythm abnormality, stroke, leg pain when walking, peripheral artery disease)

None of the above

3. Do you take aspirin regularly?
4. How many aspirins do you take regularly?
5. How often do you take aspirin?
6. What is your usual dose of aspirin?
7. The following questions ask about physical and laboratory measurements for evaluating CVD risk.
8. What is your most recent weight?
9. What is your most recent height?
10. What is your most recent blood pressure?
11. What is your most recent total cholesterol level?
12. What is your most recent HDL level?
13. What is your most recent LDL level?

- **Smoking**

1. Have you ever smoked tobacco cigarettes?
2. Have you smoked cigarettes regularly in the last year? (No means less than 1 cigarette a day for 1 year.)
3. Do you now smoke cigarettes (as of 1 month ago)?
4. How many cigarettes do you smoke per day now?
5. On the average of the entire time you smoked, how many cigarettes did you smoke per day?
6. How old were you when you first started regular cigarette smoking?
7. If you have stopped smoking cigarettes completely, how old were you when you stopped?
8. When you were smoking, did you ever stop smoking for >6 months?
9. For how many years in total did you stop smoking cigarettes? (If 6 months to 1 year, enter "1" )
10. Since your last exam, have you regularly smoked a pipe or cigar?
11. Do you smoke a pipe or cigar now?
12. E-cigarettes are battery-powered and produce vapor instead of smoke. Have you ever tried an e-cigarette?
13. Have you ever been a regular user of e-cigarettes (at least once per week)?
14. How long did you use e-cigarettes?
15. How many days per week, on average, did you use e-cigarettes while you were a regular user?
16. In the past 5 days, including today, on how many days did you smoke an e-cigarette?

- **Baseline CVD history**

1. Since the date of your last FHS examination (exam 2, several years ago), have you seen a doctor or been hospitalized?
2. Did you have any of the following heart problems? (Select ALL that apply)  
Chest pain, angina or angina pectoris  
Heart attack or myocardial infarction or MI  
Heart failure or congestive heart failure or CHF  
Atrial fibrillation or atrial flutter  
Other heart problem (valve problem, ventricular tachycardia, other rhythm problem)  
None of the above
3. Please specify any other heart problems that weren't captured in the list.
4. Did you have any of the following heart procedures? (Select ALL that apply)  
Heart catheterization or cardiac catheterization  
Heart bypass operation or coronary bypass surgery or CABG  
Procedure to unblock narrowed blood vessels to your heart muscles (PTCA, coronary angioplasty, or coronary stent)  
Other heart procedure (pacemaker, aorta surgery)  
None of the above
5. Please specify any other heart procedures that weren't captured in the list.
6. Did you have any of the following circulatory problems? (Select ALL that apply)  
Stroke, TIA (transient ischemic attack), sudden paralysis, vision loss, inability to speak  
Procedure to unblock narrowed blood vessels in your neck (carotid endarterectomy, carotid angioplasty)  
Poor blood circulation or blocked or narrowed blood vessels to the legs or feet, (claudication, peripheral arterial disease, gangrene)  
Amputation of part of a leg or toes, because of poor circulation or gangrene  
Blood clot or embolism in leg or lung  
Other circulatory problem  
None of the above"
7. Please specify any other circulatory problems that weren't captured in the list.

- **Baseline-Non-CVD Medical History**

1. Have you ever been told that you have any of the following endocrine conditions? (Select ALL that apply)  
Thyroid disease  
Diabetes mellitus  
Other kinds of endocrine diseases  
None of the above
2. Please specify any other endocrine diseases
3. Have you ever been told that you have any of the following genitourinary or gynecologic conditions? (Select ALL that apply)

- Urinary infection
  - Chronic kidney disease
  - Other kidney disease
  - Prostate disease
  - Gynecologic problems
  - None of the above
4. Have you ever been told that you have any of the following genitourinary or gynecologic conditions? (Select ALL that apply)
- Urinary infection
  - Chronic kidney disease
  - Other kidney disease
  - None of the above
5. Have you ever been told that you have any of the following genitourinary conditions? (Select ALL that apply)
- Urinary infection
  - Chronic kidney disease
  - Other kidney disease
  - Prostate disease
  - None of the above
6. Please specify the type of kidney disease
7. Please specify the type of gynecologic problems
8. Have you ever been told that you have any of the following pulmonary conditions? (Select ALL that apply)
- Emphysema
  - Pneumonia
  - Asthma
  - Sleep Apnea
  - Other kind of lung disease
  - None of the above
9. Please specify the type of lung disease
10. Have you ever been told that you have any of the following rheumatologic conditions? (Select ALL that apply)
- Gout
  - Degenerative joint disease, or osteoarthritis
  - Rheumatoid arthritis
  - Other muscle, joint, or connective tissue diseases
  - None of the above
11. Please specify the type of muscle, joint, or connective tissue disease
12. Have you ever been told that you have any of the following gastrointestinal conditions? (Select ALL that apply)
- Gallbladder disease
  - Gastric bypass surgery or a lap band

GERD or ulcer disease  
E\_LIVER Liver disease  
Other GI diseases  
None of the above"

13. Please specify the type of gastrointestinal disease
14. Have you ever been told that you have any of the following mental health conditions? (Select ALL that apply)  
  
Depression  
Anxiety  
Other mental health diseases  
None of the above
15. Please specify any other mental health diseases
16. Have you ever been diagnosed with cancer?
17. Please specify the type of cancer
18. Have you ever been told that you have any of the following other conditions? (Select ALL that apply)  
  
Eye disease  
Disease of your ear, nose, or throat  
Skin diseases  
Heart murmur  
Blood disorder  
Bleeding disorder  
Any infectious diseases  
Any other diseases  
None of the above
19. Please specify the type of eye disease
20. Please specify the type of disease of your ear, nose, or throat
21. Please specify the type of skin disease
22. Please specify the type of blood disorder
23. Please specify the type of bleeding disorder
24. Please specify the type of infectious diseases
25. Please specify any other diseases.

- **Physical Activity**

1. Are you able to walk half a mile without help? (About 4-6 blocks)
2. Rest and activity for a typical day over the past year. (A typical day = most days of the week) Activities must equal 24 hours.
3. How many hours per night do you typically sleep?
4. How many hours per day are you typically sitting?

5. How many hours per day do you spend in light activities such as standing or walking?
6. How many hours per day do you spend in moderate activity including housework (vacuum, dusting), yard chores, climbing stairs; light sports such as bowling, golf?
7. How many hours per day do you spend in heavy activity including heavy household work, heavy yard work such as stacking or chopping wood, or exercise such as intensive sports--jogging, swimming etc.?
8. The next questions are about your leisure time. In the past week, about how many hours per day did you sit and watch TV or videos?  
None or <1 hour  
1 hour  
2 hours  
3 hours  
4 hours  
5 hours or more
9. In the past week, about how many hours per day did you use a computer or play computer games or play video games?  
None or <1 hour  
1 hour  
2 hours  
3 hours  
4 hours  
5 hours or more
10. The next questions are about physical activities in the past 24 hours that may not have been captured by your phone or wearable device.
11. In the last 24 hours, how often did you have your phone or wearable device with you?  
All day and all night  
All day, but not at night  
About half of the time  
Rarely if at all
12. Did you perform any physical activities yesterday that you think were not recorded by your phone or wearable device?
13. Which activity did you do that may have been improperly recorded? (Select ONE. You will be able to add additional activities later.)  
Walking  
Jogging  
Cycling  
Tennis or other racquet sport  
Soccer, basketball, or other team sport  
Weight lifting  
Swimming  
Other
14. Please specify the type of other activity.
15. How long did you do the activity?

16. How intense was the activity?
17. Did you perform any additional physical activities that you think were not recorded by your phone or wearable device?
18. Which activity did you do that may have been improperly recorded? (Select ONE. You will be able to add additional activities later.)
- Walking
  - Jogging
  - Cycling
  - Tennis or other racquet sport
  - Soccer, basketball, or other team sport
  - Weight lifting
  - Swimming
  - Other
19. Please specify the type of other activity.
20. How long did you do the activity?
21. How intense was the activity?
- Light
  - Moderate
  - Vigorous
22. Did you perform any additional physical activities that you think were not recorded by your phone or wearable device?
23. Which activity did you do that may have been improperly recorded? (Select ONE. You will be able to add additional activities later.)
- Walking
  - Jogging
  - Cycling
  - Tennis or other racquet sport
  - Soccer, basketball, or other team sport
  - Weight lifting
  - Swimming
  - Other
24. Please specify the type of other activity.
25. How long did you do the activity?
26. How intense was the activity?
- Light
  - Moderate
  - Vigorous
27. Did you perform any additional physical activities that you think were not recorded by your phone or wearable device?

28. Which activity did you do that may have been improperly recorded? (Select ONE. You will be able to add additional activities later.)
- Walking
  - Jogging
  - Cycling
  - Tennis or other racquet sport
  - Soccer, basketball, or other team sport
  - Weight lifting
  - Swimming
  - Other
29. Please specify the type of other activity.
30. How long did you do the activity?
31. How intense was the activity?
- Light
  - Moderate
  - Vigorous

• **Depressive symptoms (CES-D)**

Reponses for all questions

- 0 - Rarely or none of the time (less than 1 day)
- 1 - Some or a little of the time (1-2 days)
- 2 - Occasionally or moderate amount of time (3-4 days)
- 3 - Most of or all of the time (5-7 days)

1. During the past week, I was bothered by things that usually don't bother me.
2. During the past week, I did not feel like eating; my appetite was poor.
3. During the past week, I felt that I could not shake off the blues, even with help from my family and friends.
4. During the past week, I felt that I was just as good as other people.
5. During the past week, I had trouble keeping my mind on what I was doing.
6. During the past week, I felt depressed.
7. During the past week, I felt that everything I did was an effort.
8. During the past week, I felt hopeful about the future.
9. During the past week, I thought my life had been a failure.
10. During the past week, I felt fearful.
11. During the past week, my sleep was restless.
12. During the past week, I was happy.
13. During the past week, I talked less than usual.
14. During the past week, I felt lonely.



15. During the past week, people were unfriendly.
16. During the past week, I enjoyed life.
17. During the past week, I had crying spells.
18. During the past week, I felt sad.
19. During the past week, I felt that people disliked me.
20. During the past week, I could not “get going.”

• **Medical history update survey**

1. Since the date of when you downloaded the eFHS app/or completed your medical history update, have you seen a doctor or been hospitalized?
2. Did you have any of the following heart problems? (Select ALL that apply)
  - Chest pain, angina or angina pectoris
  - Heart attack or myocardial infarction or MI
  - Heart failure or congestive heart failure or CHF
  - Atrial fibrillation or atrial flutter
  - Other heart problem (valve problem, ventricular tachycardia, other rhythm problem)
  - None of the above
3. Please specify any other heart problems that weren't captured in the list.
4. Did you have any of the following heart procedures? (Select ALL that apply)
  - Heart catheterization or cardiac catheterization
  - Heart bypass operation or coronary bypass surgery or CABG
  - Procedure to unblock narrowed blood vessels to your heart muscles (PTCA, coronary angioplasty, or coronary stent)
  - Other heart problem (pacemaker, aorta surgery)
  - None of the above
5. Please specify any other heart procedures that weren't captured in the list.
6. Did you have any of the following circulatory problems? (Select ALL that apply)
  - Stroke, TIA (transient ischemic attack), sudden paralysis, vision loss, inability to speak
  - Procedure to unblock narrowed blood vessels in your neck (carotid endarterectomy, carotid angioplasty)
  - Poor blood circulation or blocked or narrowed blood vessels to the legs or feet, claudication, peripheral arterial disease, gangrene)
  - Amputation of part of a leg or toes, because of poor circulation or gangrene
  - Blood clot or embolism in leg or lung
  - Other circulatory problem
  - None of the above
7. Please specify any other circulatory problems that weren't captured in the list.
8. Did you have any of the following other problems? (Select ALL that apply)
  - Diabetes
  - Cancer

9. Specify type, Physician, Place where biopsy performed, select if no biopsy
10. Since the date of when you downloaded the eFHS app/or completed your medical history update, have you been admitted to a HOSPITAL or gone to an EMERGENCY ROOM or seen a PHYSICIAN for other than a routine examination? Date?
11. What type of visit did you have?
12. What was the reason for your visit? (Select ONE)
13. Please specify the reason for your visit. Hospital Name, Doctor's Name, Location (City, State)
14. Have you any other admissions to a HOSPITAL, visits to an EMERGENCY ROOM, or visits to a PHYSICIAN for other than a routine examination since the date of when you downloaded the eFHS app/or completed your medical history update? Date?
15. What type of visit did you have?
  - Overnight admission
  - Emergency room visit
  - Day Surgery/Procedure
  - M.D. visit
16. What was the reason for your visit?
  - Heart problems
  - Stroke or transient ischemic attack (TIA), sudden paralysis, vision loss, inability to speak
  - Broken, crushed or fractured bones
  - Cancer or malignant tumor
  - Circulation problem, or blood clots
  - Other reasons
17. Please specify the reason for your visit. Hospital Name, Doctor's Name, Location (City, State)
18. Have you any other admissions to a HOSPITAL, visits to an EMERGENCY ROOM, or visits to a PHYSICIAN for other than a routine examination since the date of when you downloaded the eFHS app/or completed your medical history update? Date?
19. What type of visit did you have?
  - Overnight admission
  - Emergency room visit
  - Day Surgery/Procedure
  - M.D. visit
20. What was the reason for your visit?
  - Heart problems
  - Stroke or transient ischemic attack (TIA), sudden paralysis, vision loss, inability to speak
  - Broken, crushed or fractured bones
  - Cancer or malignant tumor
  - Circulation problem, or blood clots
  - Other reasons

21. Please specify the reason for your visit. Hospital Name, Doctor's Name, Location (City, State)
22. Have you stayed overnight as a patient in a nursing home or rehabilitation center since the date of when you downloaded the eFHS app/or completed your medical history update?
23. Please list the name and location of the nursing home or rehabilitation center and the date you were admitted.
24. Nursing home/rehabilitation center name? Location (city, State)
25. Date you entered the nursing home or rehabilitation center
26. Were you an overnight patient in a nursing home or rehabilitation center at any other time since the date of when you downloaded the eFHS app/or completed your medical history update?
27. Please list the name and location of the nursing home or rehabilitation center and the date you were admitted.
28. Nursing home/rehabilitation center name
29. Location (City, State)
30. Date you entered the nursing home or rehabilitation center?
31. Now we are going to ask you some questions about your general status.
32. What is your current marital status? (Select one)
  - Single, never married
  - Married
  - Separated
  - Divorced
  - Widowed
  - Living with partner
  - Prefer not to answer
33. Compare your health to most people your own age. Would you say your health is:
  - Better
  - About the same
  - Worse than most people
  - Don't know
34. Please list the name and address of your primary care physician. Name? Location (city, State)

- **Health Survey**

1. In general, would you say your health is:
  - 4 Excellent
  - 3 Very Good
  - 2 Good
  - 1 Fair
  - 0 Poor

2. During a typical day, does your health now limit you in these activities? If so, how much? Moderate activities, such as moving a table, pushing a vacuum cleaner, bowling, or playing golf
  - 2 Yes, limited a lot
  - 1 Yes, limited a little
  - 0 No, not limited at all
  
3. During a typical day, does your health now limit you in these activities? If so, how much? Climbing several flights of stairs
  - 2 Yes, limited a lot
  - 1 Yes, limited a little
  - 0 No, not limited at all
  
4. During the past 4 weeks, have you had any of the following problems with your work or other regular daily activities as a result your physical health?  
Accomplished less than you would like
5. During the past 4 weeks, have you had any of the following problems with your work or other regular daily activities as a result your physical health?  
Were limited in the kind of work or other activities
6. During the past 4 weeks, have you had any of the following problems with your work or other regular daily activities as a result of any emotional problems (such as feeling depressed or anxious)?  
Accomplished less than you would like
7. During the past 4 weeks, have you had any of the following problems with your work or other regular daily activities as a result of any emotional problems (such as feeling depressed or anxious)?  
Didn't do work or other activities as carefully as usual
8. During the past 4 weeks, how much did pain interfere with your normal work (including both work outside the home and housework)?
  - 0 Not at all
  - 1 A little bit
  - 2 Moderately
  - 3 Quite a bit
  - 4 Extremely
  
9. The following questions are about how you feel and how things have been with you during the PAST 4 WEEKS. For each question, please give the one answer that comes closest to the way you have been feeling.
10. How much of the time during the past 4 weeks have you felt calm and peaceful?
  - 5 All of the time
  - 4 Most of the time
  - 3 A good bit of the time
  - 2 Some of the time
  - 1 A little of the time
  - 0 None of the time

11. How much of the time during the past 4 weeks did you have a lot of energy?

- 5 All of the time
- 4 Most of the time
- 3 A good bit of the time
- 2 Some of the time
- 1 A little of the time
- 0 None of the time

12. How much of the time during the past 4 weeks have you felt downhearted and blue?

- 5 All of the time
- 4 Most of the time
- 3 A good bit of the time
- 2 Some of the time
- 1 A little of the time
- 0 None of the time

13. During the past 4 weeks, how much of the time has your physical health or emotional problems interfered with your social activities (like visiting friends, relatives, etc.)?

- 4 All of the time
- 3 Most of the time
- 2 Some of the time
- 1 A little of the time
- 0 None of the time

**Supplementary Table 2: Characteristics of participants in eFHS Participants vs those who did not enroll in the eFHS**

| Variable                                               | eFHS<br>(n=1948) | Not eFHS<br>(n=1566) | P value* |
|--------------------------------------------------------|------------------|----------------------|----------|
| Age, years, mean (SD)                                  | 52.8 (8.7)       | 56.6 (9.7)           | <0.001   |
| Age Groups, n (%)                                      |                  |                      | <0.001   |
| Age < 45                                               | 330 (16.9)       | 165 (10.5)           |          |
| 45 ≤ Age < 55                                          | 782 (40.1)       | 456 (29.1)           |          |
| 55 ≤ Age < 65                                          | 670 (34.4)       | 648 (41.4)           |          |
| Age ≥ 65                                               | 166 (8.5)        | 297 (19.0)           |          |
| Female sex, n (%)                                      | 1109 (57.0)      | 782 (49.9)           | <0.001   |
| Race (White), n (%)                                    | 1813 (93.1)      | 1414 (90.3)          | 0.003    |
| Body mass index, kg/m <sup>2</sup> , mean (SD)         | 28 (6)           | 29 (6)               | <0.001   |
| Systolic blood pressure, mmHg, mean (SD)               | 119 (14)         | 121 (15)             | <0.001   |
| Diastolic blood pressure, mmHg, mean (SD)              | 75.84 (8.35)     | 75.56 (9.00)         | 0.331    |
| Current smoking, n (%)                                 | 113 (5.8)        | 131 (8.4)            | 0.004    |
| Diabetes mellitus, n (%)                               | 122 (6.3)        | 189 (12.4)           | <0.001   |
| Hypertension, n (%)                                    | 511 (26.3)       | 582 (37.3)           | <0.001   |
| Prevalent cardiovascular disease, n (%)                | 59 (3.0)         | 84 (5.4)             | <0.001   |
| Physical activity index, mean (SD)                     | 33.6 (5.1)       | 34.4 (6.2)           | <0.001   |
| Highest Education Level Achieved                       |                  |                      | <0.001   |
| Less than or completed high school                     | 181 (9.3)        | 336 (21.7)           |          |
| Completed some college                                 | 467 (24.1)       | 441 (28.5)           |          |
| Bachelor's degree                                      | 741 (38.2)       | 479 (31.0)           |          |
| Graduate or professional degree                        | 550 (28.4)       | 291 (18.8)           |          |
| Married, living as married, living with partner, n (%) | 1446 (74.7)      | 1002 (65.1)          | <0.001   |
| Subjective Health, n (%)                               |                  |                      | <0.001   |
| Excellent                                              | 468 (24.0)       | 281 (18.0)           |          |
| Very Good                                              | 946 (48.6)       | 632 (40.6)           |          |
| Good                                                   | 451 (23.2)       | 529 (34.0)           |          |
| Poor/Fair                                              | 82 (4.2)         | 116 (7.4)            |          |
| Depressive Symptoms Scores, mean (SD)                  | 6 (7)            | 7 (8)                | <0.001   |
| Employed Full Time, n (%)                              | 1361 (70.2)      | 913 (59.3)           | <0.001   |

\* P values reported based on two-sample t-test (for continuous variables) and chi-square test (for nominal/categorical variables)

Data reflect enrollment up to January 28, 2019.

Characteristics were presented as mean ± standard deviation (SD) for continuous variables (for non-skewed distribution), numbers and percentages for nominal variables.

**Supplementary Table 3.** Definitions of Smartphone App Use, Smartwatch Use, and Digital BP Cuff Use

| System Components | N    | Deployment Frequency | Definitions of adherence in each eFHS system component                                                                                                                                                                                                                                                                                                                                 |
|-------------------|------|----------------------|----------------------------------------------------------------------------------------------------------------------------------------------------------------------------------------------------------------------------------------------------------------------------------------------------------------------------------------------------------------------------------------|
| eFHS app          | 1918 | 3-months             | Completing one survey:<br>Completing 75% of the questions in a given survey<br><br>Definitions of smartphone app use (binary outcome):<br><br><ol style="list-style-type: none"><li>1. Definition 1: Identify participants who complete at least one survey at 3-month window</li><li>2. Definition 2: Identify participants who complete all surveys at a given survey wave</li></ol> |
| Smartwatch        | 1243 | Daily                | Definition of smartwatch use (binary outcome):<br>Watch wear $\geq 5$ hours for at least 1 day per week                                                                                                                                                                                                                                                                                |
| BP Cuff           | 1115 | Weekly               | Definition of blood pressure (BP) cuff use (binary outcome):<br>Sent BP measurements at least 1 day per week                                                                                                                                                                                                                                                                           |

Smartphone app use =0 at each 3-month period for participants who enrolled in eFHS but never sent any surveys data.

Smartwatch use =0 at each week for participants who took watch but never sent any watch data

Blood pressure cuff use =0 at each week for participants who took blood pressure cuff but never sent any BP data

**Supplementary Table 4.** Predictor variables selection for final multivariable model of smartphone app use (completing at least one survey)

| Predictors                             | Surveys<br>(univariate)     |          | Surveys<br>(Each individual predictor adjusting<br>for age, sex, and 3-month period) |          |
|----------------------------------------|-----------------------------|----------|--------------------------------------------------------------------------------------|----------|
|                                        | N= 9590<br>n (eFHSID)= 1918 |          | N= 9590<br>n (eFHSID)=1918                                                           |          |
|                                        | OR<br>(95% CI)              | P-value* | OR<br>(95% CI)                                                                       | P-value* |
| Age                                    |                             |          |                                                                                      |          |
| Age < 45                               | -                           | -        | -                                                                                    | -        |
| 45 ≤ Age < 55                          | 1.03 (0.92-1.16)            | 0.566    |                                                                                      |          |
| 55 ≤ Age < 65                          | 1.29 (1.14-1.45)            | <0.001   |                                                                                      |          |
| Age ≥ 65                               | 1.60 (1.35-1.90)            | <0.001   |                                                                                      |          |
| Sex (Female)                           | 1.29<br>(1.18-1.39)         | <0.001   |                                                                                      |          |
| Time period                            |                             |          |                                                                                      |          |
| Baseline                               | -                           | -        |                                                                                      |          |
| 3-months                               | 0.17 (0.15-0.20)            | <0.001   |                                                                                      |          |
| 6-months                               | 0.14 (0.12-0.16)            | <0.001   |                                                                                      |          |
| 9-months                               | 0.09 (0.07-0.10)            | <0.001   |                                                                                      |          |
| 12-months                              | 0.08 (0.07-0.10)            | <0.001   |                                                                                      |          |
| Subjective Health                      |                             |          |                                                                                      |          |
| Excellent                              | -                           | -        | -                                                                                    | -        |
| VeryGood                               | 0.95 (0.86-1.05)            | 0.308    | 0.83 (0.47-1.48)                                                                     | 0.528    |
| Good                                   | 0.83 (0.74-0.93)            | 0.002    | 0.52 (0.27-1.02)                                                                     | 0.057    |
| Poor/Fair                              | 0.85 (0.69-1.05)            | 0.138    | 0.65 (0.19-2.22)                                                                     | 0.487    |
| Depressive Symptoms<br>Scores (scaled) | 0.95<br>(0.91-0.99)         | 0.014    | 0.80<br>(0.64-1.01)                                                                  | 0.058    |
| White                                  | 0.90<br>(0.76-1.05)         | 0.179    | 0.67<br>(0.27-1.67)                                                                  | 0.393    |
| BMI (scaled)                           | 1.00<br>(0.96-1.04)         | 0.987    | 1.04<br>(0.82-1.32)                                                                  | 0.731    |
| SBP (scaled)                           | 0.99<br>(0.95-1.03)         | 0.586    | 0.90<br>(0.70-1.16)                                                                  | 0.428    |
| DBP (scaled)                           | 0.96<br>(0.92-1.00)         | 0.051    | 0.99<br>(0.78-1.26)                                                                  | 0.923    |



|                                    |                     |         |                     |       |
|------------------------------------|---------------------|---------|---------------------|-------|
| Current Smoking                    | 0.71<br>(0.60-0.84) | < 0.001 | 0.32<br>(0.12-0.82) | 0.018 |
| Diabetes                           | 0.95<br>(0.81-1.13) | 0.583   | 0.80<br>(0.30-2.12) | 0.657 |
| Hypertension                       | 1.00<br>(0.92-1.10) | 0.928   | 0.79<br>(0.46-1.37) | 0.401 |
| Prevalent of CVD                   | 1.35<br>(1.06-1.72) | 0.015   | 2.28<br>(0.56-9.18) | 0.248 |
| Physical Activity Index            | 0.94<br>(0.90-0.98) | 0.002   | 0.85<br>(0.67-1.06) | 0.153 |
| Highest Education                  |                     |         |                     |       |
| Less than or completed high school | -                   | -       | -                   | -     |
| Completed some college             | 1.14 (0.98-1.34)    | 0.094   | 1.59 (0.66-3.83)    | 0.307 |
| Bachelor's degree                  | 1.22 (1.05-1.41)    | 0.009   | 2.54 (1.09-5.93)    | 0.030 |
| Graduate or professional degree    | 1.28 (1.10-1.50)    | 0.001   | 3.10 (1.29-7.43)    | 0.011 |
| Married                            | 1.05<br>(0.96-1.15) | 0.287   | 1.32<br>(0.78-2.24) | 0.305 |
| Full Time Employment               | 0.88<br>(0.80-0.96) | 0.004   | 1.09<br>(0.64-1.88) | 0.745 |
| Cholesterol level (scaled)         | 0.98<br>(0.94-1.02) | 0.247   | 0.91<br>(0.71-1.16) | 0.452 |
| Current Alcohol                    | 0.96<br>(0.87-1.07) | 0.461   | 0.94<br>(0.52-1.71) | 0.852 |

\* P values are derived using Z test statistic from generalized linear mixed models

Outcome is based on Definition 1 of Survey adherence: Proportions of participants who completed at least one survey at baseline and each 3-month window

**Supplementary Table 5.** Predictor variables selection for final multivariable model of smartphone app use (completing all surveys)

| Predictors                             | Surveys<br>(univariate)     |          | Surveys<br>(Each individual predictor adjusting<br>for age, sex, and weeks) |          |
|----------------------------------------|-----------------------------|----------|-----------------------------------------------------------------------------|----------|
|                                        | N= 9590<br>n (eFHSID)= 1918 |          | N= 9590<br>n (eFHSID)=1918                                                  |          |
|                                        | OR<br>(95% CI)              | P-value* | OR<br>(95% CI)                                                              | P-value* |
| Age                                    |                             |          |                                                                             |          |
| Age < 45                               | -                           | -        | -                                                                           | -        |
| 45 ≤ Age < 55                          | 0.97 (0.86-1.09)            | 0.581    |                                                                             |          |
| 55 ≤ Age < 65                          | 1.09 (0.96-1.22)            | 0.178    |                                                                             |          |
| Age ≥ 65                               | 1.17 (0.98-1.38)            | 0.077    |                                                                             |          |
| Sex (Female)                           | 1.24<br>(1.14-1.35)         | <0.001   |                                                                             |          |
| Time period                            |                             |          |                                                                             |          |
| Baseline                               | -                           | -        |                                                                             |          |
| 3-months                               | 0.53 (0.46-0.61)            | <0.001   |                                                                             |          |
| 6-months                               | 0.26 (0.22-0.29)            | <0.001   |                                                                             |          |
| 9-months                               | 0.26 (0.23-0.30)            | <0.001   |                                                                             |          |
| 12-months                              | 0.006 (0.001-0.01)          | <0.001   |                                                                             |          |
| Subjective Health                      |                             |          |                                                                             |          |
| Excellent                              | -                           | -        | -                                                                           | -        |
| VeryGood                               | 0.95 (0.86-1.05)            | 0.300    | 0.87 (0.62-1.22)                                                            | 0.418    |
| Good                                   | 0.85 (0.76-0.96)            | 0.008    | 0.68 (0.46-1.01)                                                            | 0.053    |
| Poor/Fair                              | 0.79 (0.63-0.98)            | 0.033    | 0.57 (0.28-1.17)                                                            | 0.127    |
| Depressive Symptoms<br>Scores (scaled) | 0.93<br>(0.89-0.97)         | 0.001    | 0.82<br>(0.71-0.93)                                                         | 0.003    |
| White                                  | 1.05<br>(0.90-1.24)         | 0.522    | 1.11<br>(0.66-1.88)                                                         | 0.692    |
| BMI (scaled)                           | 1.01<br>(0.97-1.05)         | 0.742    | 1.05<br>(0.92-1.21)                                                         | 0.443    |
| SBP (scaled)                           | 0.98<br>(0.94-1.02)         | 0.347    | 0.97<br>(0.83-1.12)                                                         | 0.641    |
| DBP (scaled)                           | 0.98<br>(0.94-1.02)         | 0.301    | 1.03<br>(0.89-1.18)                                                         | 0.689    |
| Current Smoking                        | 0.83<br>(0.69-0.98)         | 0.032    | 0.62<br>(0.35-1.10)                                                         | 0.105    |

|                                    |                     |        |                     |        |
|------------------------------------|---------------------|--------|---------------------|--------|
| Diabetes                           | 0.97<br>(0.82-1.15) | 0.716  | 0.96<br>(0.54-1.70) | 0.892  |
| Hypertension                       | 0.97<br>(0.89-1.07) | 0.538  | 0.89<br>(0.65-1.23) | 0.494  |
| Prevalent of CVD                   | 1.13<br>(0.89-1.42) | 0.310  | 1.31<br>(0.60-2.85) | 0.502  |
| Physical Activity Index            | 0.96<br>(0.92-1.00) | 0.057  | 0.95<br>(0.83-1.09) | 0.461  |
| Education Level                    |                     |        |                     |        |
| Less than or completed high school | -                   | -      | -                   | -      |
| Completed some college             | 1.24 (1.06-1.46)    | 0.008  | 1.68 (1.00-2.84)    | 0.051  |
| Bachelor's degree                  | 1.31 (1.13-1.53)    | <0.001 | 2.13 (1.29-3.51)    | 0.003  |
| Graduate or professional degree    | 1.41 (1.21-1.66)    | <0.001 | 2.51 (1.50-4.20)    | <0.001 |
| Married                            | 1.11<br>(1.01-1.22) | 0.035  | 1.38<br>(1.01-1.88) | 0.042  |
| Full Time Employment               | 0.93<br>(0.85-1.02) | 0.115  | 1.04<br>(0.76-1.42) | 0.816  |
| Cholesterol level (scaled)         | 0.98<br>(0.94-1.02) | 0.390  | 0.93<br>(0.81-1.08) | 0.348  |
| Current Alcohol                    | 1.07<br>(0.97-1.19) | 0.176  | 1.28<br>(0.90-1.80) | 0.165  |

\* P values are derived using Z test statistic from generalized linear mixed models

Outcome is based on Definition 2 of Survey adherence: Proportions of participants who completed all surveys at baseline and each 3-month window

**Supplementary Table 6.** Stratified analysis with smartphone app use of each 3- month period

| Exposure        | Time Periods               |              |                     |              |                     |              |                     |              |                     |              |
|-----------------|----------------------------|--------------|---------------------|--------------|---------------------|--------------|---------------------|--------------|---------------------|--------------|
|                 | N= 9590<br>n (eFHSID)=1918 |              |                     |              |                     |              |                     |              |                     |              |
|                 | Baseline<br>N= 1918        |              | 3-month<br>N= 1918  |              | 6-month<br>N= 1918  |              | 9-month<br>N= 1918  |              | 12-month<br>N= 1918 |              |
|                 | OR<br>(95% CI)             | P-<br>value* | OR<br>(95% CI)      | P-<br>value* | OR<br>(95% CI)      | P-<br>value* | OR<br>(95% CI)      | P-<br>value* | OR<br>(95% CI)      | P-<br>value* |
| Age<br>(scaled) | 1.03<br>(0.89-1.19)        | 0.662        | 1.08<br>(0.99-1.19) | 0.099        | 1.18<br>(1.08-1.30) | <0.001       | 1.30<br>(1.18-1.43) | <0.001       | 1.37<br>(1.24-1.50) | <0.001       |
| Sex<br>(Female) | 1.59<br>(1.19-2.12)        | 0.002        | 1.41<br>(1.17-1.70) | <0.001       | 1.34<br>(1.12-1.61) | 0.002        | 1.32<br>(1.10-1.60) | 0.004        | 1.22<br>(1.01-1.48) | 0.039        |

\* P values are derived using Z test statistic from generalized linear mixed models

Outcome is based on Definition 1 of Survey adherence: Proportions of participants who completed at least one survey at baseline and each 3-month window

All stratified models and interaction model adjusted for age, sex, subjective health, depressive symptoms, education level, and current smoking status

P value *Age* × 3-month = 0.518

P value *Age* × 6-month = 0.024

P value *Age* × 9-month = 0.001

P value *Age* × 12-month = 0.001

P value *Sex* × 3-month = 0.668

P value *Sex* × 6-month = 0.942

P value *Sex* × 9-month = 0.841

P value *Sex* × 12-month = 0.373

**Supplementary Table 7.** Stratified analysis for app use according to different age groups

| Exposure                            | Age                                           |          |                            |          | P-value* for age Interaction |
|-------------------------------------|-----------------------------------------------|----------|----------------------------|----------|------------------------------|
|                                     | Median age =53<br>N= 9590<br>n (eFHSID)= 1918 |          |                            |          |                              |
|                                     | Age ≤ 53<br>(N= 5065, n=1013)                 |          | Age > 53<br>(N= 4525, 905) |          |                              |
|                                     | OR<br>(95% CI)                                | P-value* | OR<br>(95% CI)             | P-value* |                              |
| Sex (Female)                        | 2.65<br>(1.38-5.10)                           | 0.004    | 2.70<br>(1.36-5.39)        | 0.005    | 0.794                        |
| Time period                         |                                               |          |                            |          |                              |
| Baseline                            | -                                             | -        | -                          | -        |                              |
| 3-months                            | 0.00 (0.00-0.01)                              | <0.001   | 0.01 (0.00-0.01)           | <0.001   | 0.582                        |
| 6-months                            | 0.00 (0.00-0.00)                              | <0.001   | 0.00 (0.00-0.01)           | <0.001   | 0.030                        |
| 9-months                            | 0.00 (0.00-0.00)                              | <0.001   | 0.00 (0.00-0.00)           | <0.001   | 0.002                        |
| 12-months                           | 0.00 (0.00-0.00)                              | <0.001   | 0.00 (0.00-0.00)           | <0.001   | 0.001                        |
| Subjective Health                   |                                               |          |                            |          |                              |
| Health Excellent                    | -                                             | -        | -                          | -        |                              |
| VeryGood                            | 0.62 (0.28-1.40)                              | 0.251    | 1.55 (0.66-3.64)           | 0.315    | 0.120                        |
| Good                                | 0.71 (0.27-1.85)                              | 0.477    | 0.66 (0.24-1.79)           | 0.417    | 0.931                        |
| Poor/Fair                           | 0.54 (0.09-3.11)                              | 0.490    | 2.03 (0.30-13.69)          | 0.466    | 0.292                        |
| Depressive Symptoms Scores (scaled) | 0.86 (0.60-1.23)                              | 0.402    | 0.85 (0.62-1.18)           | 0.332    | 0.898                        |
| Current Smoking                     | 0.31 (0.08-1.18)                              | 0.085    | 0.62 (0.14-2.70)           | 0.526    | 0.462                        |
| Education                           |                                               |          |                            |          |                              |
| Less than or completed high school  | -                                             | -        | -                          | -        |                              |
| Completed some college              | 2.31 (0.56-9.56)                              | 0.249    | 1.13 (0.36-3.54)           | 0.834    | 0.492                        |
| Bachelor's degree                   | 3.53 (0.92-13.59)                             | 0.066    | 1.43 (0.46-4.46)           | 0.535    | 0.310                        |
| Graduate or professional degree     | 3.38 (0.84-13.69)                             | 0.087    | 2.34 (0.72-7.57)           | 0.157    | 0.692                        |

\* P values are derived using Z test statistic from generalized linear mixed models

Outcome is based on Definition 1 of Survey adherence: Proportions of participants who completed at least one survey at baseline and each 3-month window

All stratified models and interaction model adjusted for time of use, sex, subjective health, depressive symptoms, Education Level, and current smoking status

**Supplementary Table 8.** Predictor variables selection for final multivariable model of smartwatch use

| Predictors                             | Watch Users<br>(univariate)  |          | Watch Users<br>(Each individual predictor adjusting<br>for age, sex, and weeks) |          |
|----------------------------------------|------------------------------|----------|---------------------------------------------------------------------------------|----------|
|                                        | N= 64636<br>n (eFHSID)= 1243 |          | N= 64636<br>n (eFHSID)= 1243                                                    |          |
|                                        | OR<br>(95% CI)               | P-value* | OR<br>(95% CI)                                                                  | P-value* |
| Age                                    |                              |          |                                                                                 |          |
| Age < 45                               | -                            | -        | -                                                                               | -        |
| 45 ≤ Age < 55                          | 1.06 (1.01-1.10)             | 0.015    |                                                                                 |          |
| 55 ≤ Age < 65                          | 1.24 (1.19-1.30)             | <0.001   |                                                                                 |          |
| Age ≥ 65                               | 1.60 (1.50-1.71)             | <0.001   |                                                                                 |          |
| Sex (Female)                           | 1.15<br>(1.11-1.19)          | <0.001   |                                                                                 |          |
| Weeks (scaled)                         | 0.63<br>(0.62-0.64 )         | <0.001   |                                                                                 |          |
| Subjective Health                      |                              |          |                                                                                 |          |
| Excellent                              | -                            | -        | -                                                                               | -        |
| Very Good                              | 0.92 (0.88-0.96)             | <0.001   | 0.62 (0.33-1.16)                                                                | 0.133    |
| Good                                   | 0.68 (0.65-0.71)             | <0.001   | 0.25 (0.12-0.52)                                                                | <0.001   |
| Poor/Fair                              | 0.75 (0.69-0.81)             | <0.001   | 0.36 (0.09-1.38)                                                                | 0.137    |
| Depressive Symptoms<br>Scores (scaled) | 0.90<br>(0.89-0.92 )         | <0.001   | 0.70<br>(0.54-0.90 )                                                            | 0.005    |
| White                                  | 0.76<br>(0.72-0.81 )         | <0.001   | 0.51<br>(0.20-1.27 )                                                            | 0.149    |
| BMI (scaled)                           | 0.91<br>(0.89-0.92)          | <0.001   | 0.76<br>(0.59-0.98 )                                                            | 0.034    |
| SBP (scaled)                           | 1.02<br>(1.01-1.04 )         | 0.003    | 1.02<br>(0.77-1.35 )                                                            | 0.900    |
| DBP (scaled)                           | 1.00<br>(0.98-1.01 )         | 0.640    | 1.05<br>(0.80-1.357)                                                            | 0.738    |
| Current Smoking                        | 0.71<br>(0.66-0.76 )         | <0.001   | 0.32<br>(0.11-0.98)                                                             | 0.045    |

|                                    |                     |        |                     |       |
|------------------------------------|---------------------|--------|---------------------|-------|
| Diabetes                           | 0.99<br>(0.93-1.06) | 0.822  | 0.94<br>(0.31-2.84) | 0.914 |
| Hypertension                       | 1.05<br>(1.02-1.09) | 0.005  | 0.94<br>(0.51-1.72) | 0.829 |
| Prevalent of CVD                   | 1.30<br>(1.18-1.43) | <0.001 | 1.55<br>(0.35-6.91) | 0.568 |
| Physical Activity Index            | 0.98<br>(0.96-0.99) | 0.003  | 0.99<br>(0.77-1.28) | 0.934 |
| Highest Education                  |                     |        |                     |       |
| Less than or completed high school | -                   | -      | -                   | -     |
| Completed some college             | 0.96 (0.90-1.02)    | 0.199  | 0.72 (0.26-2.00)    | 0.531 |
| Bachelor's degree                  | 1.03 (0.97-1.10)    | 0.289  | 1.29 (0.49-3.41)    | 0.605 |
| Graduate or professional degree    | 1.06 (1.00-1.13)    | 0.058  | 1.12 (0.42-3.00)    | 0.827 |
| Married                            | 1.20<br>(1.15-1.24) | <0.001 | 1.57<br>(0.87-2.82) | 0.132 |
| Full Time Employment               | 0.88<br>(0.85-0.91) | <0.001 | 1.04<br>(0.58-1.89) | 0.892 |
| Cholesterol level (scaled)         | 0.99<br>(0.97-1.00) | 0.144  | 0.99<br>(0.77-1.31) | 0.992 |
| Current Alcohol                    | 1.04<br>(0.99-1.08) | 0.089  | 1.38<br>(0.72-2.63) | 0.334 |

\* P values are derived using Z test statistic from generalized linear mixed models

**Supplementary Table 9.** Predictor variables selection for final multivariable model of digital blood pressure cuff use

| Predictors                             | Blood Pressure Cuff<br>(univariate) |          | Blood Pressure Cuff<br>(Each individual predictor adjusting<br>for age, sex, and weeks) |          |
|----------------------------------------|-------------------------------------|----------|-----------------------------------------------------------------------------------------|----------|
|                                        | OR<br>(95% CI)                      | P-value* | OR<br>(95% CI)                                                                          | P-value* |
|                                        | N= 57980<br>n (eFHSID)= 1115        |          | N= 57980<br>n (eFHSID)=1115                                                             |          |
| Age                                    |                                     |          |                                                                                         |          |
| Age < 45                               | -                                   | -        | -                                                                                       | -        |
| 45 ≤ Age < 55                          | 1.31 (1.24-1.39)                    | <0.001   |                                                                                         |          |
| 55 ≤ Age < 65                          | 1.82 (1.72-1.93)                    | <0.001   |                                                                                         |          |
| Age ≥ 65                               | 3.05 (2.83-3.29)                    | <0.001   |                                                                                         |          |
| Sex (Female)                           | 1.00<br>(0.96-1.04)                 | 0.992    |                                                                                         |          |
| Weeks (scaled)                         | 0.67<br>(0.66-0.68)                 | <0.001   |                                                                                         |          |
| Subjective Health                      |                                     |          |                                                                                         |          |
| Excellent                              |                                     |          |                                                                                         |          |
| Very Good                              | 0.96 (0.92-1.00)                    | 0.049    | 0.89 (0.63-1.24)                                                                        | 0.483    |
| Good                                   | 0.84 (0.80-0.88)                    | <0.001   | 0.69 (0.47-1.02)                                                                        | 0.065    |
| Poor/Fair                              | 1.08 (0.98-1.20)                    | 0.121    | 1.01 (0.45-2.24)                                                                        | 0.989    |
| Depressive Symptoms<br>Scores (scaled) | 0.94 (0.93-0.96)                    | <0.001   | 0.89 (0.77-1.02)                                                                        | 0.093    |
| White                                  | 0.86<br>(0.81-0.92)                 | 0<0.001  | 0.73<br>(0.44-1.24)                                                                     | 0.244    |
| BMI (scaled)                           | 1.01<br>(0.99-1.03)                 | 0.368    | 0.98<br>(0.85-1.13)                                                                     | 0.783    |
| SBP (scaled)                           | 1.10<br>(1.08-1.12)                 | <0.001   | 1.01<br>(0.87-1.18)                                                                     | 0.882    |
| DBP (scaled)                           | 1.00<br>(0.98-1.01)                 | 0.743    | 1.01<br>(0.87-1.17)                                                                     | 0.935    |
| Current Smoking                        | 0.82<br>(0.75-0.89)                 | < 0.001  | 0.68<br>(0.36-1.30)                                                                     | 0.243    |
| Diabetes                               | 1.28<br>(1.19-1.38)                 | <0.001   | 1.24<br>(0.67-2.28)                                                                     | 0.496    |
| Hypertension                           | 1.21<br>(1.16-1.26)                 | <0.001   | 1.12<br>(0.81-1.56)                                                                     | 0.482    |
| Prevalent of CVD                       | 1.44<br>(1.31-1.58)                 | <0.001   | 1.63<br>(0.74-3.56)                                                                     | 0.223    |



|                                    |                     |        |                     |       |
|------------------------------------|---------------------|--------|---------------------|-------|
| Physical Activity Index            | 1.00<br>(0.98-1.01) | 0.635  | 0.94<br>(0.82-1.09) | 0.425 |
| Highest Education                  |                     |        |                     |       |
| Less than or completed high school | -                   | -      | -                   | -     |
| Completed some college             | 1.01 (0.95-1.09)    | 0.714  | 1.32 (0.76-2.29)    | 0.321 |
| Bachelor's degree                  | 0.82 (0.77-0.88)    | <0.001 | 1.03 (0.61-1.74)    | 0.917 |
| Graduate or professional degree    | 1.02 (0.95-1.09)    | 0.650  | 1.49 (0.87-2.55)    | 0.142 |
| Married                            | 0.98<br>(0.94-1.02) | 0.266  | 1.05<br>(0.75-1.45) | 0.784 |
| Full Time Employment               | 0.80<br>(0.77-0.83) | <0.001 | 0.87<br>(0.63-1.21) | 0.410 |
| Cholesterol level (scaled)         | 0.95<br>(0.93-0.96) | <0.001 | 0.90<br>(0.78-1.04) | 0.169 |
| Current Alcohol                    | 0.86<br>(0.82-0.90) | <0.001 | 0.81<br>(0.57-1.16) | 0.251 |

\* P values are derived using Z test statistic from generalized linear mixed models

**Supplementary Table 10.** Stratified analysis with smartwatch use time (Weeks  $\leq$  26 and Weeks  $>$  26)

| Exposure     | Weeks (1-52)                 |          |                            |          | P-value* for weeks Interaction |
|--------------|------------------------------|----------|----------------------------|----------|--------------------------------|
|              | N= 64636<br>n (eFHSID)= 1243 |          |                            |          |                                |
|              | Weeks $\leq$ 26<br>(N=32318) |          | Weeks $>$ 26<br>(N= 32318) |          |                                |
|              | OR<br>(95% CI)               | P-value* | OR<br>(95% CI)             | P-value* |                                |
| Age (scaled) | 1.17<br>(0.92-1.50)          | 0.198    | 3.03<br>(1.91-4.81)        | <0.001   | <0.001                         |
| Sex (Female) | 1.32<br>(0.80-2.19)          | 0.275    | 2.48<br>(0.96-6.35)        | 0.059    | 0.004                          |

\* P values are derived using Z test statistic from generalized linear mixed models

All stratified models and interaction model adjusted for age, sex, subjective health, depressive symptoms, BMI and current smoking status

**Supplementary Table 11.** Stratified analysis with digital blood pressure cuff use time (Weeks  $\leq$  26 and Weeks  $>$  26)

| Exposure     | Weeks (1-52)                 |          |                            |          | P-value* for weeks Interaction |
|--------------|------------------------------|----------|----------------------------|----------|--------------------------------|
|              | N= 57980<br>n (eFHSID)= 1115 |          |                            |          |                                |
|              | Weeks $\leq$ 26<br>(N=28990) |          | Weeks $>$ 26<br>(N= 28990) |          |                                |
|              | OR<br>(95% CI)               | P-value* | OR<br>(95% CI)             | P-value* |                                |
| Age (scaled) | 1.45<br>(1.29-1.64)          | <0.001   | 2.71<br>(2.10-3.49)        | <0.001   | <0.001                         |
| Sex (Female) | 1.03<br>(0.80-1.32)          | 0.824    | 1.16<br>(0.69-1.94)        | 0.578    | 0.124                          |

\* P values are derived using Z test statistic from generalized linear mixed models  
All stratified models and interaction model adjusted for age, sex, subjective health, and depressive symptoms

**Supplementary Table 12.** Stratified analysis for smartwatch use according to different age groups (Age ≤ 53 and Age > 53)

| Exposure                            | Age                                            |          |                             |          | P-value* for age Interaction |
|-------------------------------------|------------------------------------------------|----------|-----------------------------|----------|------------------------------|
|                                     | Median age =53<br>N= 64636<br>n (eFHSID)= 1243 |          |                             |          |                              |
|                                     | Age ≤ 53<br>(N= 34996, n=673)                  |          | Age > 53<br>(N= 29640, 570) |          |                              |
|                                     | OR<br>(95% CI)                                 | P-value* | OR<br>(95% CI)              | P-value* |                              |
| Sex (Female)                        | 1.67<br>(0.80-3.5)                             | 0.173    | 1.44<br>(0.69-3.01)         | 0.338    | 0.786                        |
| Weeks (scaled)                      | 0.19<br>(0.18-0.20)                            | <0.001   | 0.31<br>(0.30-0.33)         | <0.001   | <0.001                       |
| Subjective Health                   |                                                |          |                             |          |                              |
| Excellent                           | -                                              | -        | -                           | -        |                              |
| Very Good                           | 0.70 (0.28-1.76)                               | 0.451    | 0.86 (0.34-2.16)            | 0.745    | 0.663                        |
| Good                                | 0.66 (0.21-2.05)                               | 0.469    | 0.21 (0.07-0.63)            | 0.005    | 0.147                        |
| Poor/Fair                           | 0.55 (0.07-3.97)                               | 0.550    | 1.12 (0.13-9.40)            | 0.918    | 0.498                        |
| Depressive Symptoms Scores (scaled) |                                                |          |                             |          |                              |
|                                     | 0.73 (0.49-1.10)                               | 0.131    | 0.76 (0.54-1.06)            | 0.107    | 0.896                        |
| BMI (scaled)                        |                                                |          |                             |          |                              |
|                                     | 0.77 (0.51-1.15)                               | 0.205    | 0.93 (0.64-1.36)            | 0.716    | 0.778                        |
| Current smoking Status              |                                                |          |                             |          |                              |
|                                     | 0.35 (0.07-1.66)                               | 0.185    | 0.43 (0.09-2.10)            | 0.296    | 0.999                        |

\* P values are derived using Z test statistic from generalized linear mixed models

All stratified models and interaction model adjusted for time of use, sex, subjective health, depressive symptoms, BMI and current smoking status

**Supplementary Table 13.** Stratified analysis for digital blood pressure cuff use according to different age groups (Age ≤ 53 and Age > 53)

| Exposure                                  | Age<br>Median age =53<br>N= 57980<br>n (eFHSID)= 1115 |          |                            |          | P-value* for<br>age<br>Interaction |
|-------------------------------------------|-------------------------------------------------------|----------|----------------------------|----------|------------------------------------|
|                                           | Age ≤ 53<br>(N=30316, n=583)                          |          | Age > 53<br>(N=27664, 532) |          |                                    |
|                                           | OR<br>(95% CI)                                        | P-value* | OR<br>(95% CI)             | P-value* |                                    |
| Sex (Female)                              | 1.23<br>(0.85-1.79)                                   | 0.278    | 0.87<br>(0.57-1.32)        | 0.507    | 0.212                              |
| Weeks (scaled)                            | 0.44<br>(0.43-0.46)                                   | <0.001   | 0.56<br>(0.54-0.58)        | <0.001   | <0.001                             |
| Subjective Health                         |                                                       |          |                            |          |                                    |
| Excellent                                 | -                                                     | -        | -                          | -        |                                    |
| Very Good                                 | 0.54 (0.34-0.84)                                      | 0.007    | 1.75 (1.06-2.91)           | 0.030    | 0.001                              |
| Good                                      | 0.70 (0.41-1.20)                                      | 0.194    | 0.83 (0.46-1.51)           | 0.549    | 0.615                              |
| Poor/Fair                                 | 0.72 (0.25-2.09)                                      | 0.547    | 2.12 (0.58-7.75)           | 0.254    | 0.163                              |
| Depressive<br>Symptoms Scores<br>(scaled) | 0.88 (0.70-1.09)                                      | 0.236    | 0.89 (0.73-1.09)           | 0.266    | 0.723                              |

\* P values are derived using Z test statistic from generalized linear mixed models

All stratified models and interaction model adjusted for time of use, sex, subjective health, and depressive symptoms

**Supplementary Table 14.** Characteristics of eFHS Participants stratified according different age groups

| Variable                                               | Age < 45<br>(n=330) | 45 ≤ Age < 55<br>(n=782) | 55 ≤ Age < 65<br>(n=670) | Age ≥ 65<br>(n=166) | P value* |
|--------------------------------------------------------|---------------------|--------------------------|--------------------------|---------------------|----------|
| Female sex, n (%)                                      | 193 (58.5)          | 437 (55.9)               | 388 (57.9)               | 91 (54.8)           | 0.744    |
| Race (White), n (%)                                    | 291 (88.2)          | 732 (93.6)               | 644 (96.1)               | 146 (88)            | <0.001   |
| Body mass index, kg/m <sup>2</sup> , mean (SD)         | 27.4 (5.7)          | 28.2 (5.6)               | 28.5 (5.7)               | 29.0 (5.6)          | 0.006    |
| Systolic blood pressure, mmHg , mean (SD)              | 113 (12)            | 116 (13)                 | 122 (14)                 | 127 (14)            | <0.001   |
| Diastolic blood pressure, mmHg , mean (SD)             | 75 (8)              | 76 (9)                   | 76 (8.2)                 | 75 (8)              | 0.001    |
| Current smoking, n (%)                                 | 21 (6.4)            | 49 (6.3)                 | 39 (5.8)                 | 4 (2.4)             | 0.261    |
| Diabetes mellitus, n (%)                               | 6 (1.8)             | 34 (4.4)                 | 58 (8.7)                 | 24 (14.7)           | <0.001   |
| Hypertension, n (%)                                    | 29 (8.8)            | 161 (20.6)               | 229 (34.3)               | 92 (55.4)           | <0.001   |
| Prevalent cardiovascular disease, n (%)                | 3 (0.9)             | 13 (1.7)                 | 25 (3.7)                 | 18 (10.8)           | <0.001   |
| Physical activity index, mean (SD)                     | 33.76 (4.7)         | 33.4 (5.2)               | 33.8 (5.3)               | 32.9 (4.4)          | 0.102    |
| Education Level Achieved                               |                     |                          |                          |                     | <0.001   |
| Less than or completed high school                     | 23 (7.0)            | 56 (7.2)                 | 82 (12.3)                | 20 (12.1)           |          |
| Completed some college                                 | 49 (14.8)           | 173 (22.2)               | 195 (29.4)               | 50 (30.3)           |          |
| Bachelor's degree                                      | 144(43.6)           | 336 (43.1)               | 215 (32.4)               | 46 (27.9)           |          |
| Graduate or professional degree                        | 114 (34.5)          | 215 (27.6)               | 172 (25.9)               | 49 (29.7)           |          |
| Married, living as married, living with partner, n (%) | 247 (75.1)          | 593 (76.4)               | 488 (73.5)               | 118 (71.1)          | 0.408    |
| Subjective Health, n (%)                               |                     |                          |                          |                     | 0.878    |
| Excellent                                              | 83 (25.2)           | 181 (23.2)               | 170 (25.4)               | 34 (20.5)           |          |
| Very Good                                              | 155 (47.0)          | 385 (49.3)               | 318 (47.5)               | 88 (53.0)           |          |
| Good                                                   | 77 (23.3)           | 180 (23.0)               | 154 (23.0)               | 40 (24.1)           |          |
| Poor/ Fair                                             | 15 (4.5)            | 35 (4.6)                 | 28 (4.2)                 | 4 ( 2.4)            |          |
| Depressive Symptoms Scores, mean (SD)                  | 6 (6)               | 6 (6)                    | 6 (7)                    | 6 (6)               | 0.999    |
| Employed Full Time, n (%)                              | 257 (78.1)          | 614 (78.9)               | 442 (66.3)               | 48 (29.1)           | <0.001   |

Data reflect enrollment up to January 28, 2019.

Characteristics were presented as mean ± standard deviation (SD) for continuous variables (for non-skewed distribution), numbers and percentages for nominal variables.

\* P values reported based on Analysis of variance / ANOVA (for continuous variables) and chi-square test (for nominal/categorical variables)

**Supplementary Table 15.** Characteristics of eFHS Participants stratified according type of phone

| Variable                                               | Android<br>(n=277) | iPhone<br>(n=1663) | P value |
|--------------------------------------------------------|--------------------|--------------------|---------|
| Age, years, mean (SD)                                  | 53.1 (8.8)         | 52.8 (8.7)         | 0.534   |
| Age Groups, n (%)                                      |                    |                    | 0.946   |
| <i>Age</i> < 45                                        | 46 (16.6)          | 284 (17.1)         |         |
| 45 ≤ <i>Age</i> < 55                                   | 108 (39.0)         | 671 (40.3)         |         |
| 55 ≤ <i>Age</i> < 65                                   | 98 (35.4)          | 570 (34.3)         |         |
| <i>Age</i> ≥ 65                                        | 25 (9.0)           | 138 (8.3)          |         |
| Female sex, n (%)                                      | 131 (47.3)         | 971 (58.4)         | <0.001  |
| Race (White), n (%)                                    | 263 (94.9)         | 1543 (92.8)        | 0.236   |
| Body mass index, kg/m <sup>2</sup> , mean (SD)         | 29.1 (5.9)         | 28.1 (5.6)         | <0.001  |
| Systolic blood pressure, mmHg, mean (SD)               | 121 (14)           | 118 (14)           | <0.001  |
| Diastolic blood pressure, mmHg, mean (SD)              | 77 (9)             | 76 (8)             | 0.029   |
| Current smoking, n (%)                                 | 26 (9.4)           | 87 (5.2)           | 0.010   |
| Diabetes mellitus, n (%)                               | 22 (8.0)           | 100 (6.0)          | 0.275   |
| Hypertension, n (%)                                    | 87 (31.5)          | 420 (25.3)         | 0.035   |
| Prevalent cardiovascular disease, n (%)                | 10 (3.6)           | 49 (2.9)           | 0.684   |
| Physical activity index, mean (SD)                     | 34.6 (6.1)         | 33.4 (4.9)         | <0.001  |
| Education Level Achieved                               |                    |                    | <0.001  |
| Less than or completed high school                     | 33 (12.0)          | 148 (8.9)          |         |
| Completed some college                                 | 95 (34.4)          | 371 (22.4)         |         |
| Bachelor's degree                                      | 88 (31.9)          | 651 (39.3)         |         |
| Graduate or professional degree                        | 60 (21.7)          | 486 (29.3)         |         |
| Married, living as married, living with partner, n (%) | 190 (68.8)         | 1250 (75.7)        | 0.018   |
| Subjective Health, n (%)                               |                    |                    | 0.020   |
| Excellent                                              | 49 (17.7)          | 418 (25.2)         |         |
| Very Good                                              | 147 (53.1)         | 795 (47.8)         |         |
| Good                                                   | 64 (23.1)          | 385 (23.2)         |         |
| Poor/ Fair                                             | 17 (6.1)           | 64 (3.9)           |         |
| Depressive Symptoms Scores, mean (SD)                  | 6 (7)              | 6 (7)              | 0.759   |
| Employed Full Time, n (%)                              | 198 (71.5)         | 1161 (70.2)        | 0.717   |

\* P values reported based on two-sample t-test (for continuous variables) and chi-square test (for nominal/categorical variables)

Data reflect enrollment up to January 28, 2019.

Characteristics were presented as mean ± standard deviation (SD) for continuous variables (for non-skewed distribution), numbers and percentages for nominal variables.
